# Supplementary material for: An electrospray chemical ionization source for real-time measurement of atmospheric organic and inorganic vapors
Source: Copernicus journal article supplement (doi:10.5194/amt-10-3609-2017), 2017-10-04
Supplement: Supplementary file 1 [file amt-10-3609-2017-supplement.pdf]

Supplement of Atmos. Meas. Tech., 10, 3609–3625, 2017  
<https://doi.org/10.5194/amt-10-3609-2017-supplement>  
© Author(s) 2017. This work is distributed under  
the Creative Commons Attribution 3.0 License.

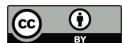

*Supplement of*

## **An electrospray chemical ionization source for real-time measurement of atmospheric organic and inorganic vapors**

**Yue Zhao et al.**

*Correspondence to:* Joel A. Thornton ([thornton@atmos.washington.edu](mailto:thornton@atmos.washington.edu)) and Felipe D. Lopez-Hilfiker ([felipe.lopez@psi.ch](mailto:felipe.lopez@psi.ch))

The copyright of individual parts of the supplement might differ from the CC BY 3.0 License.

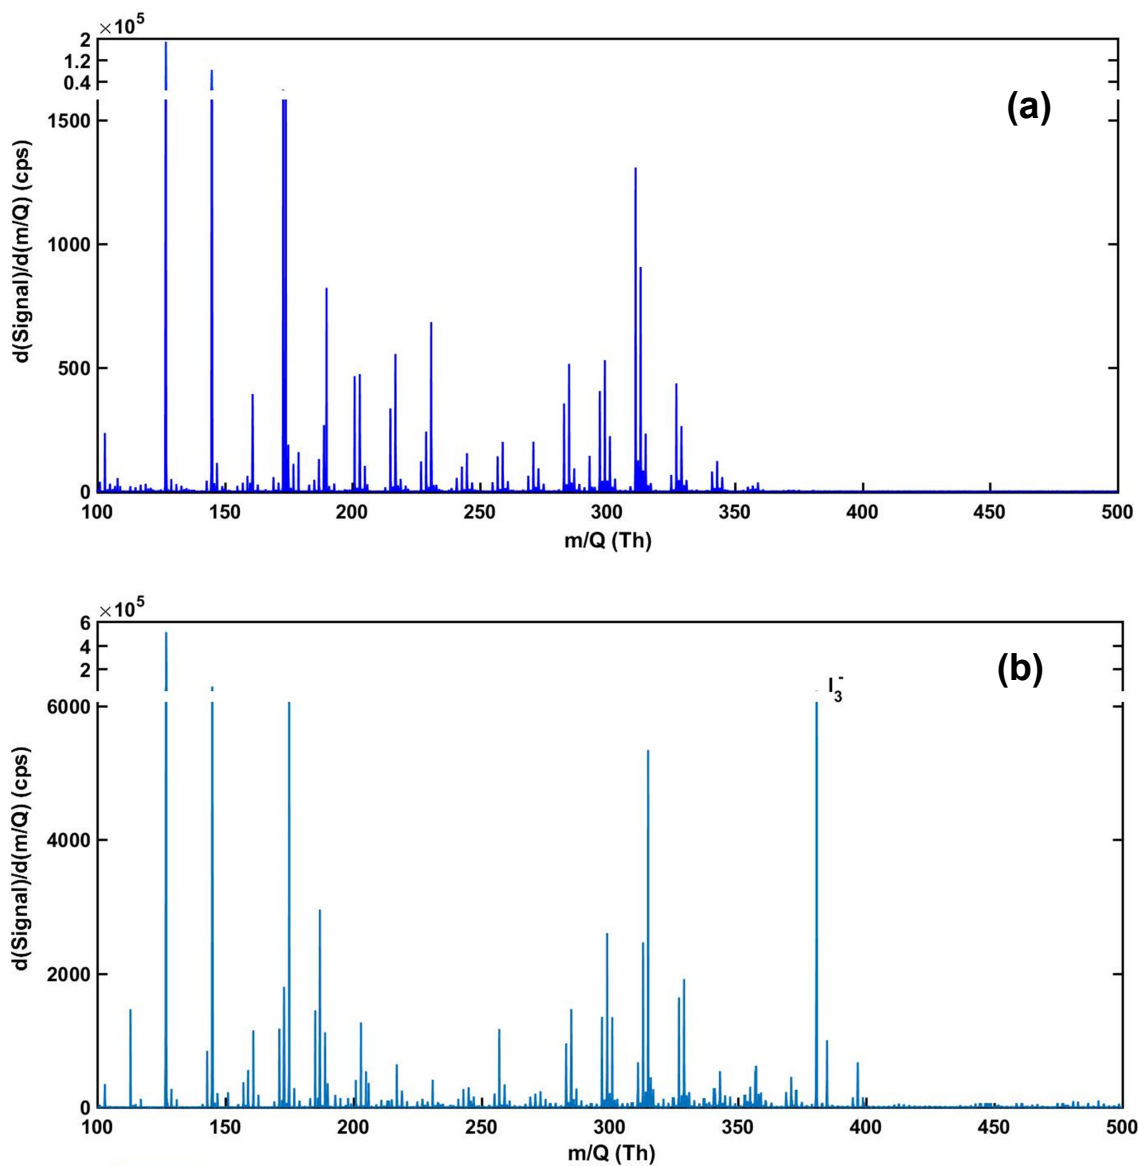

**Figure S1** High resolution mass spectra obtained during ozonolysis of  $\alpha$ -pinene in a steady-state chamber using (a) low-pressure HRTof-CIMS and (b) HRTof-ESCIMS with iodide as the reagent ion. The peaks associated with sodium iodide salt in the ESCI mass spectrum were removed for clarity.
